# Supplementary material for: LAMP2A, and other chaperone-mediated autophagy related proteins, do not decline with age in genetically heterogeneous UM-HET3 mice
Source: publisher site journal article supplement (doi:10.18632/aging.204796), 2023-06-13
Supplement: Supplementary file [file aging-v15i11-204796-supplementary-material-SD1.pdf]

## SUPPLEMENTARY FIGURE

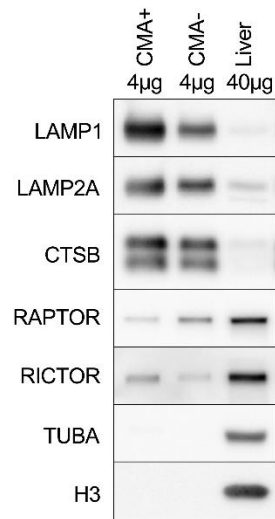

**Supplementary Figure 1. Data in support of Figure 2 – controls for lysosome enriched fractions.** 4 µg of light (CMA+), 4 µg of heavy (CMA-), or 40 µg of whole liver lysates were analyzed for LAMP1 (lysosome membrane), LAMP2A (lysosome membrane), CTSB (lysosome matrix), RAPTOR (CMA- lysosomes), RICTOR (CMA+ lysosomes), TUBA (cytoplasm), and H3 (nucleus). The representative western blot indicates appropriate separation of CMA+ and CMA- lysosomes, similar to what has been observed by previously published methods.
